# Supplementary material
Source: Springer Nature journal article supplement (https://www.springermedizin.de/resource/supplementary/13058_2009_2439_MOESM2_ESM.pdf/9701420)

(a)

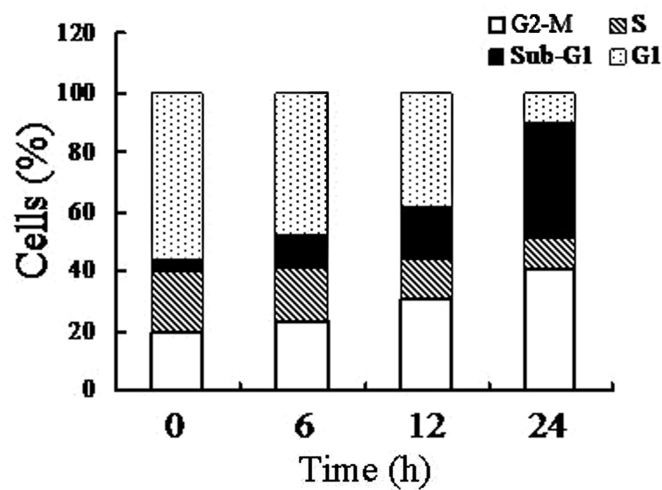

(b)

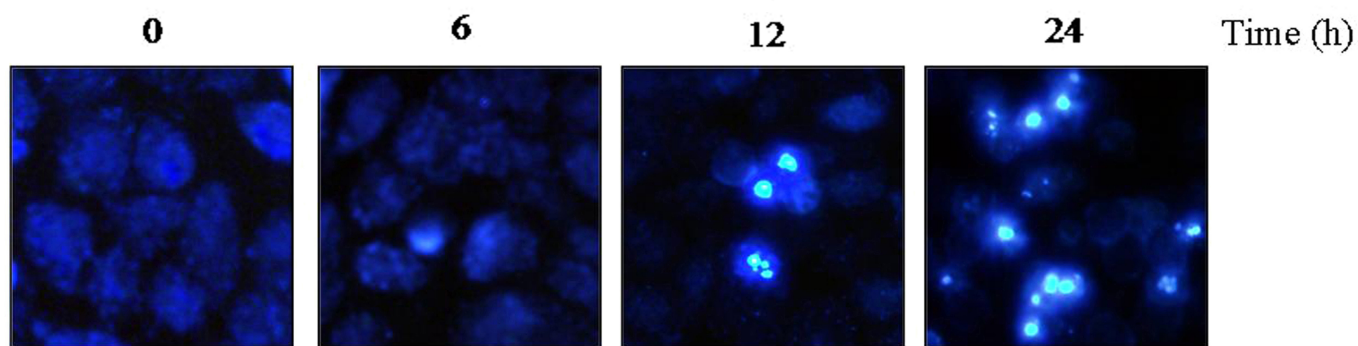

(c)

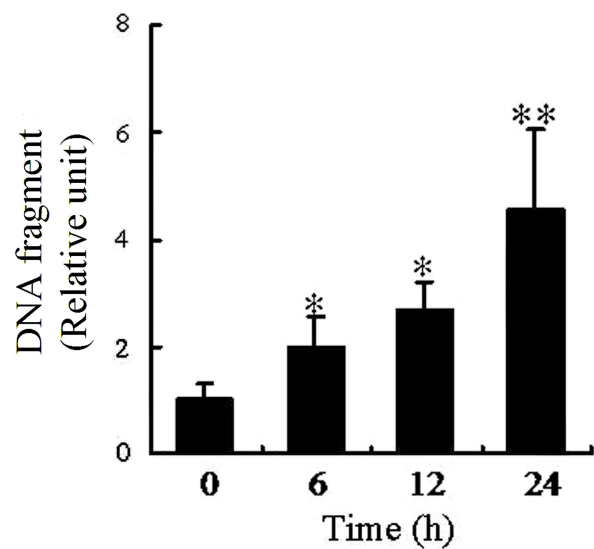

(d)

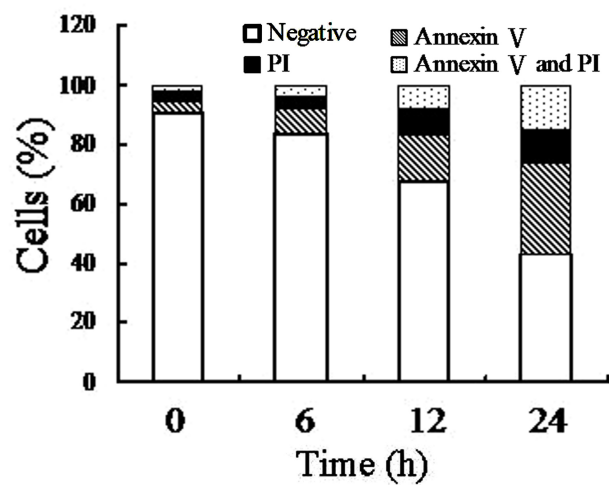

Supplement: MOESM2 [file 9701420]
